# Supplementary material for: Effect of connexin 43 inhibition by the mimetic peptide Gap27 on corneal wound healing, inflammation and neovascularization
Source: PubMed Central journal article supplement — Br J Pharmacol. 2016 Aug 26;173(19):2880–93. doi: 10.1111/bph.13568 (PMC5055138; doi:10.1111/bph.13568), 2016-08-26
Supplement: BPH-173-2880-s002.pdf [file BPH-173-2880-s002.pdf]

## Supplementary Figure 2

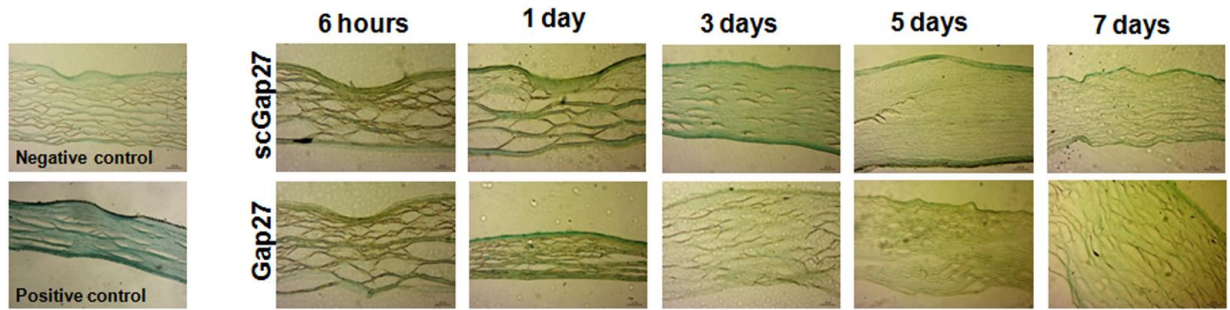

Supplementary figure 2 **Gap27 treatment did not induce apoptosis of cells in any corneal layer.**

Cell apoptosis analysis was done using TUNEL assay. Positive controls are corneas treated with hydrogen peroxide and negative controls are corneas treated with PBS. Images were taken using the 10x lens of a light microscope fitted with a digital camera.
